# Supplementary material for: Inquieta la puerta de salida
Source: Hindawi journal article supplement (doi:10.1155/2021/8271899), 2006-01-01

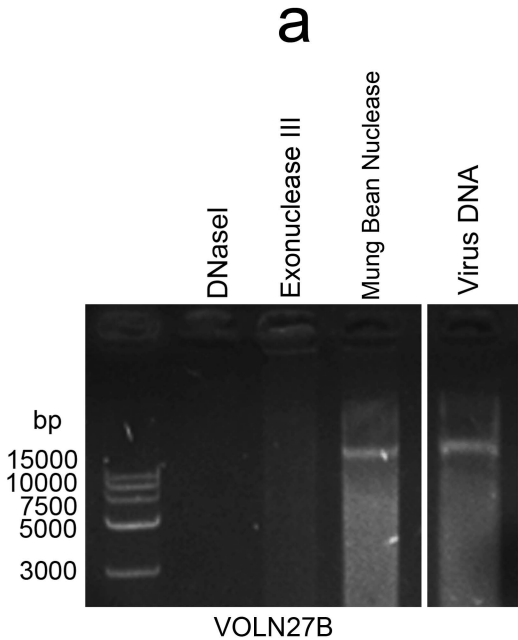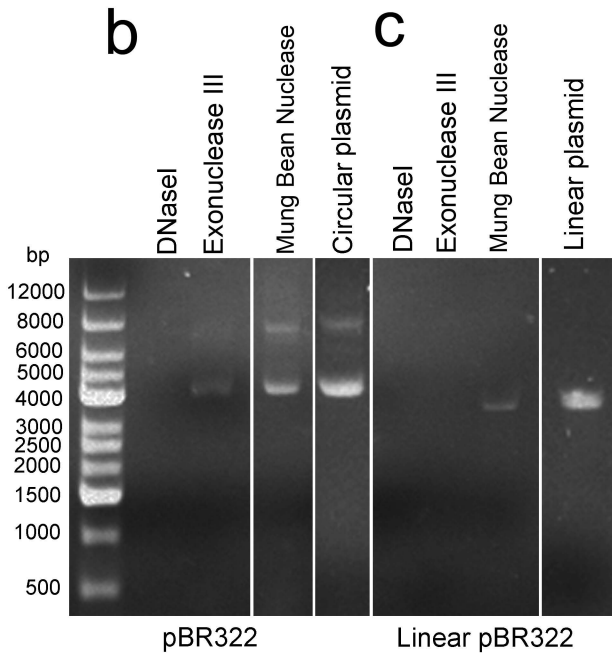

Supplement: f4 [file 8271899.f4.pdf]
